# Supplementary material for: FCC/α-Fe biphasic nano-sites synergize with CNTs to enhance reversible hydrogen storage of MgH2
Source: Royal Society of Chemistry journal article supplement (doi:10.1039/d4qi01081g), 2024-01-01
Supplement: d4qi01081g1.pdf [file d4qi01081g1.pdf]

## Supplementary Materials

### FCC/ $\alpha$ -Fe biphasic nano-sites synergize with CNTs to enhance reversible hydrogen storage of $\text{MgH}_2$

Haiyi Wan <sup>a</sup>, Junqi Qiu<sup>a</sup>, Haotian Guan<sup>a</sup>, Zhao Ding <sup>a, b, \*</sup>, Yangfan Lu<sup>a, b</sup>, Yu'an  
Chen <sup>a, b, c, \*</sup>, Jingfeng Wang<sup>a, b, c</sup>, Fusheng Pan<sup>a, b, c</sup>

<sup>a</sup> College of Materials Science and Engineering, National Engineering Research Center for  
Magnesium Alloys, National Innovation Center for Industry-Education Integration of Energy  
Storage Technology, Chongqing University, Chongqing 400044, China

<sup>b</sup> Chongqing Institute of New Energy Storage Materials and Equipment, Chongqing, 401135,  
China

<sup>c</sup> National Key Laboratory of Advanced Casting Technologies, Chongqing University, Chongqing  
400044, China

**\*Corresponding author:**

E-mail address: zhaoding@cqu.edu.cn (Zhao Ding); chenyan@cqu.edu.cn (Yu'an  
Chen).

## Experimental

### Synthesis of VTiFe alloy

All raw materials were commercially purchased and used without further purification. VTiFe alloy catalyst was synthesized via wet chemical mechanical milling under Ar atmosphere (99.999% purity). Briefly, a mixture of 1.625 g V, 0.680 g Ti and 2.695 g Fe (99% purity, Linyi Research and Innovation Materials Co., Ltd.) was milled in a planetary ball mill (FRITSCH Pulverisette 4) using stainless steel jar and balls. To prevent excessive cold welding, 15 mL of heptane was added as a process control agent. The milling was performed at a speed of 350 rpm with a ball-to-material weight ratio of 10:1. The milling was carried out in an alternating forward and reverse mode, with a 5 min pause every 15 min, for a total of 40 h. The as-synthesized VTiFe alloy catalyst was vacuum-dried at 100°C for 10 h.

### Preparation of MgH<sub>2</sub>-VTiFe and MgH<sub>2</sub>-VTiFe-CNTs composites

The as-synthesized VTiFe alloy catalyst with various loading ratios ( $x = 2, 6, 10,$  and 25 wt%) was mixed with commercial MgH<sub>2</sub> (98%, Shanghai Magnesium Power Technology Co., Ltd) by mechanical milling for 12 h under Ar atmosphere. The final prepared composite is defined as MgH<sub>2</sub>- $x$  wt% VTiFe. The ball-to-powder weight ratio was 30:1 and the milling speed was 400 rpm. The ball milling was performed in an alternating forward and reverse mode for 10 min each, with a 10 min pause between each milling period to prevent excessive temperature rise in the powder. Under unchanged processing conditions, MgH<sub>2</sub>-6 wt% VTiFe composite material was first prepared by ball milling for 8 h. Subsequently, 3 wt.% multi-walled CNTs (3-15 nm diameter, Suiheng Technology Co., Ltd) was added and the mixture was further ball milled for 4 h to obtain the MgH<sub>2</sub>-6 wt.% VTiFe-3 wt.% CNTs composite. As a control sample, MgH<sub>2</sub> without catalysts doping, denoted as milled MgH<sub>2</sub>, was prepared in the same method.

### Materials characterization and measurements

The phase composition of the samples was analyzed by X-ray diffraction (XRD, PANalytical X' Pert Powder) with Cu K $\alpha$  radiation with a scanning rate of 5 °C/min. The

microscopic morphology, microstructure, and elemental distribution of the catalyst and composites were investigated using an environmental scanning electron microscope (ESEM, Quattro S, FEI), a transmission electron microscope (TEM, Talos F200S, FEI) equipped with energy-dispersive X-ray spectroscopy (EDS), and a high-resolution transmission electron microscope (HRTEM). X-ray photoelectron spectroscopy (XPS) was performed on a Thermo SCIENTIFIC ESCALAB Xi+ spectrometer with monochromatic Al K $\alpha$  radiation (E=1486.68 eV) to analyze the chemical states of elements in the samples. All binding energies were calibrated with C1s peak (284.8 eV).

Hydrogen storage performance of the samples was tested by a full-automatic Sievert-type ab/desorption instrument (PCTPro, Setaram). Temperature-programmed-dehydrogenation (TPD) measurements were carried out to investigate the dehydrogenation behavior of samples at different heating rates from room temperature to 400°C. Isothermal dehydrogenation and hydrogenation were performed at 0.01 MPa and 3 MPa initial hydrogen pressure respectively. The thermodynamic properties of the samples were analyzed by pressure-composition-temperature (PCT) measurements. For each performance test, 50 mg of sample powder was loaded into the vessel in the argon-filled glove box.

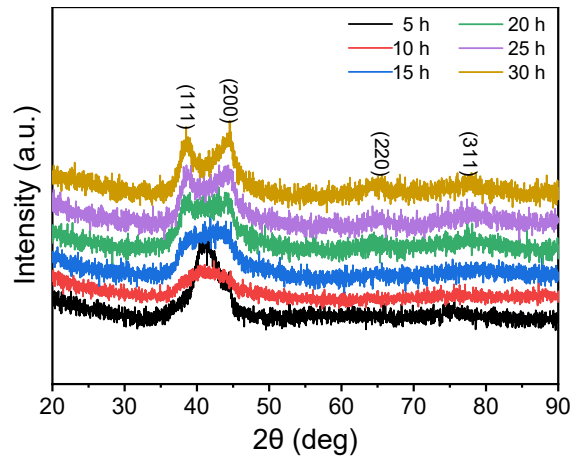

**Fig.S1** XRD patterns of VTiFe alloy at different ball milling times.

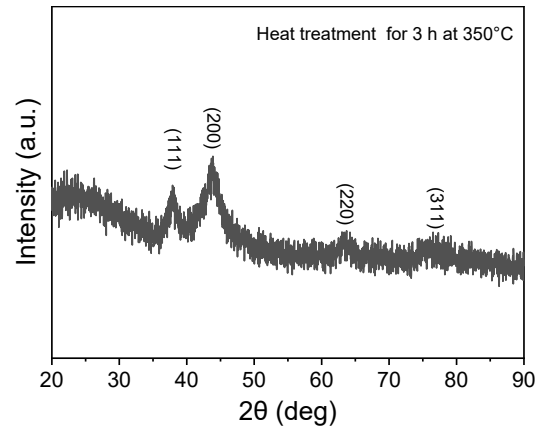

**Fig.S2** XRD patterns of VTiFe alloy after heating treatment for 3 h at 350°C.

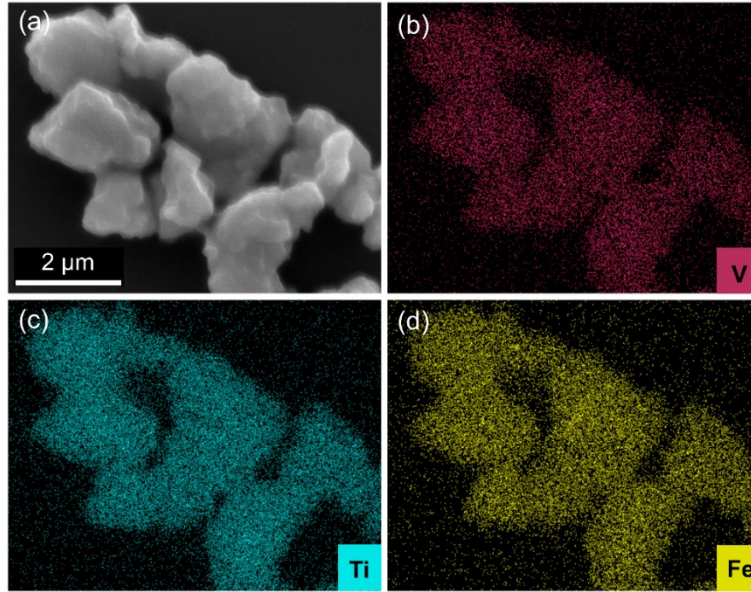

**Fig.S3** (a) SEM images and corresponding EDS elemental mappings results of (b) V, (c) Ti and (d) Fe elements of the VTiFe alloy.

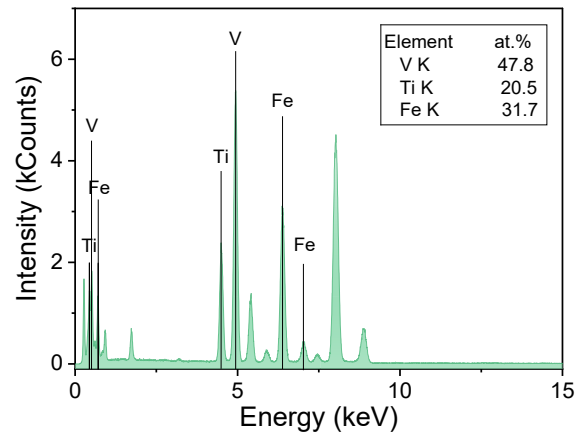

**Fig.S4** EDS mapping results of VTiFe alloy.
